# Supplementary material
Source: publisher figshare collection journal article supplement (https://karger.figshare.com/articles/dataset/_/5129938)
Supplement: Supplementary file 1 [file 1]

**Suppl. Tab.** Übersicht der eingeschlossenen Studien

| Autor, Jahr           | L   | a/s | N  | FB                | Psychotherapie                                           | Pharmakotherapie                                                                                                                                       | Design                  | Outcome nach Akuttherapie                                                                                                                           | FU in Monaten                                                                        | Art des FU                                                                                                                                                                                                      | Outcome nach FU                                         |
|-----------------------|-----|-----|----|-------------------|----------------------------------------------------------|--------------------------------------------------------------------------------------------------------------------------------------------------------|-------------------------|-----------------------------------------------------------------------------------------------------------------------------------------------------|--------------------------------------------------------------------------------------|-----------------------------------------------------------------------------------------------------------------------------------------------------------------------------------------------------------------|---------------------------------------------------------|
| Koppers et al. [2011] | NL  | a   | 52 | HAMD-17, PDT CIDI | 16 Sitzungen in 6 Monaten                                | Startmedikation: Venlafaxin (75 mg)<br><br>Wechsel möglich: SSRI (vor allem Fluvoxamin); TCA (Nortriptylin); Nortriptylin + Lithium; 6 Monate          | RCT<br>PDT vs. PDT + AD | kein signifikanter Unterschied<br>HAMD-17 ≤ 7<br>Genesung: PDT: 32,1%; PDT + AD: 42,4%<br>[de Jonghe et al., 2004]<br><br>für FU: 37% der Completer | 60                                                                                   | keine Angaben                                                                                                                                                                                                   | Rückfälle: PDT: 37%, PDT + AD: 44%;<br>⇒ PDT = PDT + AD |
| Maina et al. [2009]   | I   | a   | 92 | HAMD-17           | BDT<br>15–30 Sitzungen (M = 18,32; SD 8,46) in 6 Monaten | Paroxetin oder Citalopram (20–60 mg/Tag); 6 Monate Akuttherapie; 6 Monate Erhaltungstherapie                                                           | RCT<br>AD vs. BDT + AD  | gleich wirksam: BDT + AD (64,1% remittiert); AD (61,4% remittiert)<br>[Maina et al., 2007]<br><br>für FU: nur Patienten mit Remission               | FU-1: die ersten 6 Monate<br>6 + 24; Erhaltungs-AD<br>FU-2: 6 + 48<br>naturalistisch | Rezidiv: FU-1/FU-2: 40,8%/46,9% (ADE);<br>25%/27,5% (BDT + ADE);<br>⇒ BDT + ADE > ADE                                                                                                                           |                                                         |
| Dobson et al. [2008]  | USA | a   | 92 | BDI, HAMD-17      | BA, KT<br>max. 24 Sitzungen in 4 Monaten Akuttherapie    | Paroxetin (max. 50 mg/Tag); 4 Monate Akuttherapie; 12 Monate Erhaltungstherapie, dann ein Teil weiterhin Medikation (ADE), ein Teil Placebo (PlaceboE) | RCT<br>KT vs. BA vs. AD | BA vergleichbar mit AD; beides KT überlegen [Dimidjian et al., 2006]<br><br>für FU: nur Patienten mit Ansprechen                                    | FU-1: Erhaltungstherapie<br>12; FU-mit AD<br>2: 24<br>naturalistisch                 | Rückfälle FU-1: KT: 39%, BA: 50%, ADE: 53%, PlaceboE: 59%;<br>Anhaltendes Ansprechen FU-1: KT: 44%, BA: 34%, ADE: 23%, PlaceboE: 20%;<br>Rezidiv FU-2: KT: 24%, BA: 26%, ADE: 52%;<br>Anhaltende Genesung FU-2: |                                                         |

KT: 35%, BA: 28%;  
⇒ KT = BA =  
ADE >PlaceboE

|                                                |    |      |                     |                                                                   |                                                                                                                                                                                                                                          |                                                     |                                                                                                                           |                                                                                                                                                                                                                                             |                                                                                                                                                                                                                                                                                    |                                                                                                                |
|------------------------------------------------|----|------|---------------------|-------------------------------------------------------------------|------------------------------------------------------------------------------------------------------------------------------------------------------------------------------------------------------------------------------------------|-----------------------------------------------------|---------------------------------------------------------------------------------------------------------------------------|---------------------------------------------------------------------------------------------------------------------------------------------------------------------------------------------------------------------------------------------|------------------------------------------------------------------------------------------------------------------------------------------------------------------------------------------------------------------------------------------------------------------------------------|----------------------------------------------------------------------------------------------------------------|
| Schramm D et al. [2007]<br>Zobel et al. [2011] | s  | 97   | HAMD-17, IPT<br>BDI | 15 Einzel- (M = 12,8; SD 2,75) und 8 Gruppensitzungen in 5 Wochen | Startmedikation: Sertralin; ITT: 90,2 mg/Tag (SD 43,9 mg/Tag); Completer: 86,03 mg/Tag (SD 41,9 mg/Tag) Wechsel möglich: Amitriptylin / Amitriptylinoxid; ITT: 175,43 mg/Tag (SD 66,9 mg/Tag); Completer: 182,17 mg/Tag (SD 69,7 mg/Tag) | RCT<br>IPT + AD vs. AD + CM                         | IPT + AD = AD + CM<br>FU1: 12;<br>FU2: 7512<br>Ansprechen: 70% (IPT + AD); 49% (AD + CM)<br><br>für FU: Completer und ITT | naturalistisch,<br>Behandlung im FU1: 89% insgesamt; IPT: 69% (AD), 75% (Psychotherapie); AD: 79% (AD), 59% (Psychotherapie);<br><br>Behandlung im FU2 insgesamt (kein signifikanter Unterschied zwischen IPT und AD); 56 % (PT), 80 % (AD) | Rückfälle FU1: IPT+AD: 7-13% ; AD: 29-32%<br>Anhaltendes Ansprechen: IPT+AD : 69 %, AD+CM: 36%<br>Anhaltende Remission: IPT+AD: 35 %, AD+CM: 20%<br>⇒ IPT+AD > AD<br><br>Rezidiv FU2: IPT+CM: 33%, AD+CM : 31%<br>Anhaltende Remission: IPT+AD: 28 %, AD+CM: 11 %<br>⇒ IPT+AD > AD |                                                                                                                |
| Mynors-Wallis et al. [2000]                    | UK | a    | 113                 | HAMD-17 PL<br>6 Sitzungen in 12 Wochen                            | Fluvoxamin (100 mg/Tag); Paroxetin (20 mg/Tag); 12 Wochen                                                                                                                                                                                | RCT<br>PL (Arzt) vs. PL (Pflege) vs. AD vs. PL + AD | PL = A = AD + PL<br>52<br>für FU: nur Completer                                                                           | naturalistisch                                                                                                                                                                                                                              | Genesung: PL Arzt: 62%, PL Pflege: 56%, AD: 56%, PL + AD: 66%;<br>⇒ PL = AD = AD + PL                                                                                                                                                                                              |                                                                                                                |
| de Jong-Meyer et al. [1996]                    | D  | a, s | 155                 | BDI, HAMD<br>8 Wochen                                             | KVT<br>8 Wochen                                                                                                                                                                                                                          | Amitriptylin (150 mg/Tag); 8 Wochen                 | RCT<br>KVT + AD vs. AD + CM                                                                                               | KVT + AD = AD + CM (keine signifikanten Unterschiede); (s > a)                                                                                                                                                                              | 12<br>naturalistisch                                                                                                                                                                                                                                                               | Ansprechen: a: AD + CM: 33%, KVT + AD: 64–71%;<br>s: AD + CM: 67–69%, KVT + AD: 49–68%;<br>⇒ KT + AD = KT + CM |
| Blackburn                                      | UK | a    | 36                  | BDI                                                               | KT                                                                                                                                                                                                                                       | keine Vorschriften, meist                           | RCT                                                                                                                       | a: KT + AD = KT >                                                                                                                                                                                                                           | 24                                                                                                                                                                                                                                                                                 | Erhaltungstherapie Rückfälle:                                                                                  |

|                      |     |   |                   |                                                                              |                                                                                                                                          |                                                                                       |                                                                                                                                         |                                                                                                                                    |                                                                                                                                                                                          |
|----------------------|-----|---|-------------------|------------------------------------------------------------------------------|------------------------------------------------------------------------------------------------------------------------------------------|---------------------------------------------------------------------------------------|-----------------------------------------------------------------------------------------------------------------------------------------|------------------------------------------------------------------------------------------------------------------------------------|------------------------------------------------------------------------------------------------------------------------------------------------------------------------------------------|
| et al. [1986]        |     |   |                   | 12–15 Wochen nach Akuttherapie 6 Monate lang jede 6. Woche Booster-Sitzungen | Amitriptylin oder Clomipramin (150 mg/Tag); 12–15 Wochen; 6 Monate Erhaltungstherapie                                                    | KT vs. AD vs. KT + AD                                                                 | AD s: $KT + AD > KT = AD$<br>[Blackburn und Bishop, 1983; Blackburn et al., 1981]                                                       | für die ersten 6 Monate<br><br>naturalistisch (6–24 Monate)                                                                        | KT: 23%, AD: 78%, KT + AD: 21%;<br>⇒ $KT = KT + ADE > ADE$                                                                                                                               |
| Evans et al. [1992]  | USA | a | 44                | BDI, HAMD-17                                                                 | KT max. 20 Sitzungen in 12 Wochen<br><br>Imipraminhydrochlorid (75–300 mg/Tag); 12 Wochen<br><br>nur ein Teil bekommt Erhaltungstherapie | RCT KT vs. AD vs. KT + AD                                                             | alle Behandlungsarme 24 gleich wirksam; [Hollon et al., 1992]<br><br>für FU: nur Patienten mit Ansprechen                               | medikamentöse Erhaltungstherapie für die ersten 12 Monate; nicht bei KT / KT + AD<br><br>naturalistisch                            | Rückfälle: AD: 50%, KT + AD: 15%, KT: 21%, ADE: 32%;<br>⇒ $KT = ADE = KT + AD > AD$                                                                                                      |
| Shea et al. [1992]   | USA | a | 76                | LIFE-II-II, KVT, IPT HAMD-17 für 16 Wochen                                   | Imipraminhydrochlorid; Woche 4: 163 mg/Tag; Woche 8: 231 mg/Tag; 16 Wochen                                                               | RCT KVT vs. IPT vs. AD + CM vs. Placebo + CM                                          | alle Behandlungsarme 18 gleich wirksam [Elkin et al., 1989]<br><br>für FU: kein Ausschluss, aber Fokus auf Patienten mit Therapieerfolg | naturalistisch<br><br>Behandlung im FU: KVT: 14%, IPT: 43%, Imipramin + CM: 44%, Placebo + CM: 27%                                 | Rückfälle: KVT: 36%, IPT: 33%, AD + CM: 50%, Placebo + CM: 33%;<br>Genesung: KVT: 30%, IPT: 26%, AD + CM: 19%, Placebo + CM: 20%;<br>⇒ $KVT = IPT = AD + CM = Placebo + CM$              |
| Simons et al. [1986] | USA | a | 70 (44 Responder) | BDI, HAMD                                                                    | KT max. 20 Sitzungen in 12 Wochen<br><br>Nortriptylin + max. 12 CM-Sitzungen; 12 Wochen                                                  | RCT KT vs. AD vs. KT + Placebo vs. KT + AD<br>FU: Angaben beziehen sich auf Patienten | alle Behandlungsarme 12 gleich wirksam [Murphy et al., 1984]                                                                            | naturalistisch<br><br>53% begaben sich entweder wieder in Therapie oder hatten einen Rückfall: 81% ohne und 36% mit Therapieerfolg | Rückfälle: KT: 20%, AD: 66%, KT + Placebo: 18%, KT + AD: 43%;<br>Remission: KT: 80%, AD: 33%, KT + Placebo: 82 %, KT + AD: 57%<br><br>Behandlungsgruppen mit AD: höheres Rückfallrisiko; |

| mit Ansprechen         |          |                |                                   |                                                                         |                                                                       | nach Akuttherapie ⇒ KT / KT + Placebo > AD / AD + KT    |                                                                                                                                 |                                                                                                                                                                                                                                                                              |
|------------------------|----------|----------------|-----------------------------------|-------------------------------------------------------------------------|-----------------------------------------------------------------------|---------------------------------------------------------|---------------------------------------------------------------------------------------------------------------------------------|------------------------------------------------------------------------------------------------------------------------------------------------------------------------------------------------------------------------------------------------------------------------------|
| Beck et al. USA [1985] | a 22     | BDI, HAMD-17   | KT 20 Sitzungen in 12 Wochen      | Amitriptylinhydrochlorid (75–200 mg/Tag); 12 Wochen                     | RCT KT vs. KT + AD<br><br>für FU: nur Completer                       | KT = KT + AD<br><br>12                                  | naturalistisch<br><br>KT + AD: 91% hatten weitere KT– Sitzungen (M = 14,18);<br>KT: 71% hatten weitere KT– Sitzungen (M = 5,93) | «markedly or completely improved»:<br>KT: 58%, KT + AD: 82%;<br>⇒ KT = KT + AD                                                                                                                                                                                               |
| Kovacs et al. [1981]   | USA a 35 | BDI, HAMD-17   | KT max. 20 Sitzungen in 12 Wochen | Imipraminhydrochlorid (75–250 mg/Tag) + max. 12 CM–Sitzungen; 12 Wochen | RCT KT vs. AD<br><br>für FU: nur Completer                            | KT > AD [Rush et al., 1977]<br><br>12                   | naturalistisch                                                                                                                  | Remission:<br>KT: 56%, AD: 35%; nur 1 signifikanter Unterschied: Selbstbewertung der depressiven Symptomatik (KT > AD);<br>⇒ KT = AD                                                                                                                                         |
| Weissman et al. [1981] | USA a 62 | RDS, HAMD, BDI | IPT 16 Wochen                     | Amitriptylinhydrochlorid (100–200 mg/Tag); 16 Wochen                    | RCT AD vs. IPT vs. AD + IPT vs. KG (ungeplante Sitzungen nach Bedarf) | IPT = AD > KG und < 12 IPT + AD [Weissman et al., 1979] | naturalistisch<br><br>(15–40% nahmen Psychopharmaka; kein signifikanter Unterschied, jedoch häufiger bei AD: 27–40% vs. 15–27%) | signifikante Verbesserung des sozialen Funktionsniveaus nur bei IPT; bezogen auf den Zeitraum: 28% symptomfrei, 35% zunächst depressiv – dann Verbesserung, 15% depressive > symptomfreie Phasen, 3% Verschlechterung, 8% chronisch depressiv;<br>⇒ AD = IPT = AD + IPT = KG |

L = Land; NL = Niederlande; UK = United Kingdom; I = Italien; D = Deutschland; s = stationär; a = ambulant; N = Stichprobengröße; FB = Fragebogen zur Messung der depressiven Symptomatik; HAMD = Hamilton Depression Scale; BDI = Beck Depression Inventory; CIDI = Composite International Diagnostic Interview; SSRI = selektive Serotonin-

Wiederaufnahmehemmer; IPT = interpersonelle Psychotherapie; PDT = psychodynamic treatment; BDT = brief dynamic psychotherapy; BA = behavioral activation; KT = kognitive Therapie; KVT = kognitive Verhaltenstherapie; PL = Problemlösetherapie; FU = Follow-up; CM = clinical management; ITT = Intention-to-Treat; SD = standard deviation; LIFE-II-II = Longitudinal Interval Follow-up Evaluation II; AD = Antidepressivum; RDS = Raskin Depression Scale.

Rückfall = relapse; Ansprechen = response; Remission = remission; Genesung = recovery; Rezidiv = recurrence; anhaltendes Ansprechen = sustained response; anhaltende Remission = sustained remission; anhaltende Genesung=sustained recovery.

---

**Suppl. Table** Characteristics of studies included

| Author, Year          | L  | o/i | N  | Q                    | Psychotherapy                                          | Pharmacotherapy                                                                                                                                                                                                  | Design                  | Outcome after acute treatment                                                                                                                      | FU in months                  | type of FU                                      | Outcome after FU                                                                                                                                                                                                                                                                                            |
|-----------------------|----|-----|----|----------------------|--------------------------------------------------------|------------------------------------------------------------------------------------------------------------------------------------------------------------------------------------------------------------------|-------------------------|----------------------------------------------------------------------------------------------------------------------------------------------------|-------------------------------|-------------------------------------------------|-------------------------------------------------------------------------------------------------------------------------------------------------------------------------------------------------------------------------------------------------------------------------------------------------------------|
| Koppers et al. [2011] | NL | o   | 52 | HAMD-17, PDT<br>CIDI | 16 sessions in 6 months                                | First medication: Venlafaxine (75 mg)<br><br>exchange possible: SSRI (especially Fluvoxamine); TCA (Nortriptyline); Nortriptyline + Lithium; 6 months                                                            | RCT<br>PDT vs. PDT + AD | no significant difference<br>HAMD-17 $\leq$ 7<br>recovery:<br>PDT: 32.1%; PDT + AD: 42.4%<br>[de Jonghe et al., 2004]<br><br>FU: 37% of completers | 60                            | no details provided                             | relapses:<br>PDT: 37%, PDT + AD: 44%;<br>$\Rightarrow$ PDT = PDT + AD                                                                                                                                                                                                                                       |
| Maina et al. [2009]   | I  | o   | 92 | HAMD-17 BDT          | 15–30 sessions (M = 18.32; SD 8.46) in 6 months        | Paroxetine or Citalopram (20–60 mg/Day); 6 months acute treatment; 6 months maintenance therapy                                                                                                                  | RCT<br>AD vs. BDT + AD  | same efficacy: BDT + AD (64.1% remission); AD (61.4% remission)<br>[Maina et al., 2007]<br><br>FU: only patients with remission                    | FU-1: 6 + 24;<br>FU-2: 6 + 48 | first 6 months maintenance-<br>naturalistic     | recurrence:<br>FU-1/FU-2:<br>40.8%/46.9% (AD <sub>E</sub> );<br>25%/27.5% (BDT + AD <sub>E</sub> );<br>$\Rightarrow$ BDT + AD <sub>E</sub> > AD <sub>E</sub>                                                                                                                                                |
| Dobson et al. [2008]  | US | o   | 92 | BDI, HAMD-17         | BA, CT max. 24 sessions in 4 months of acute treatment | Paroxetine (max. 50 mg/Day); 4 months acute treatment; 12 months maintenance therapy, afterwards some continued drug treatment (AD <sub>E</sub> ), some continued with placebo treatment (Placebo <sub>E</sub> ) | RCT<br>CT vs. BA vs. AD | BA comparable to AD; both superior to CT [Dimidjian et al., 2006]<br><br>FU: only patients who responded                                           | FU-1: 12;<br>FU-2: 24         | maintenance therapy with AD<br><br>naturalistic | relapses FU-1:<br>CT: 39%, BA: 50%, AD <sub>E</sub> : 53%, Placebo <sub>E</sub> : 59%;<br>sustained Response FU-1:<br>CT: 44%, BA: 34%, AD <sub>E</sub> : 23%, Placebo <sub>E</sub> : 20%;<br>recurrence FU-2:<br>CT: 24%, BA: 26%, AD <sub>E</sub> : 52%;<br>sustained recovery FU-2:<br>CT: 35%, BA: 28%; |

⇒ CT = BA = AD<sub>E</sub> > Placebo<sub>E</sub>

|                                                              |            |                     |                                                |                                                                                                                                                                                                                                                                                                                |                                                                  |                                                                                                                         |                                                                                                                                                                                                                                                                                       |                                                                                                                                                                                                                                                                                                               |
|--------------------------------------------------------------|------------|---------------------|------------------------------------------------|----------------------------------------------------------------------------------------------------------------------------------------------------------------------------------------------------------------------------------------------------------------------------------------------------------------|------------------------------------------------------------------|-------------------------------------------------------------------------------------------------------------------------|---------------------------------------------------------------------------------------------------------------------------------------------------------------------------------------------------------------------------------------------------------------------------------------|---------------------------------------------------------------------------------------------------------------------------------------------------------------------------------------------------------------------------------------------------------------------------------------------------------------|
| Schramm G i 97<br>et al.<br>[2007]<br>Zobel et<br>al. [2011] |            | HAMD-17, IPT<br>BDI | 15 individual-<br>group sessions in 5<br>weeks | First medication:<br>(M = Sertralin;<br>12.8; SD 2.75) and 8<br>ITT: 90.2 mg/Day (SD<br>43.9 mg/Day);<br>Completer: 86.03 mg/Day<br>(SD 41.9 mg/Day)<br>exchange possible:<br>Amitriptyline /<br>Amitriptylinoxide; ITT:<br>175.43 mg/Day (SD<br>66.9 mg/Day); Completer:<br>182.17 mg/Day (SD<br>69.7 mg/Day) | RCT<br>IPT + AD vs.<br>AD + CM                                   | IPT + AD = AD + CM<br>FU1: 12;<br>FU2: 75<br>Response: 70% (IPT +<br>AD); 49% (AD + CM)<br><br>FU: Completer and<br>ITT | naturalistic,<br>treatment<br>during FU1:<br>89% in total;<br>IPT: 69%<br>(AD), 75%<br>(Psychotherap<br>y);<br>AD: 79%<br>(AD),<br>59% (Psychoth<br>erapy);<br><br>Treatment<br>during FU2 in<br>total (no<br>significant diff.<br>between IPT<br>and AD):<br>56 % (PT), 80<br>% (AD) | relapses FU1:<br>IPT+AD: 7-13% ; AD: 29-<br>32%<br>sustained response:<br>IPT+AD : 69 %, AD+CM:<br>36%<br>sustained remission:<br>IPT+AD: 35 %, AD+CM:<br>20%<br>⇒ IPT+AD > AD<br><br>recurrence FU2:<br>IPT+CM: 33%, AD+CM :<br>31%<br>sustained remission:<br>IPT+AD: 28 %, AD+CM: 11<br>%<br>⇒ IPT+AD > AD |
| Mynors-<br>Wallis et<br>al. [2000]                           | UK o 113   | HAMD-17 PS          | 6 sessions in 12<br>weeks                      | Fluvoxamine<br>(100 mg/Day); Paroxetine<br>(20 mg/Day); 12 weeks                                                                                                                                                                                                                                               | RCT<br>PS(Physician) v<br>s.<br>PS(Nursing) vs.<br>AD vs. PS+ AD | PS= A = AD + PS 52<br><br>FU: only Completer                                                                            | naturalistic                                                                                                                                                                                                                                                                          | recovery:<br>PS Physician: 62%, PS<br>Nursing: 56%, AD: 56%, PS+<br>AD: 66%;<br>⇒ PS= AD = AD + PL                                                                                                                                                                                                            |
| de Jong-<br>Meyer et<br>al. [1996]                           | D o, i 155 | BDI,<br>HAMD        | CBT<br>8 weeks                                 | Amitriptyline<br>(150 mg/Day); 8 weeks                                                                                                                                                                                                                                                                         | RCT<br>CBT + AD vs.<br>AD + CM                                   | CBT + AD =<br>AD + CM (no<br>significant<br>differences); (i > o) 12                                                    | naturalistic                                                                                                                                                                                                                                                                          | response:<br>o: AD + CM: 33%, CBT +<br>AD: 64-71%;<br>i: AD + CM: 67-69%, CBT +<br>AD: 49-68%;<br>⇒ CT + AD = CT + CM                                                                                                                                                                                         |

|                         |    |      |                                              |                                                                                              |                                                                                                              |                                                                            |                                                                                                                                             |    |                                                                                                                                                                                                                                                                                        |
|-------------------------|----|------|----------------------------------------------|----------------------------------------------------------------------------------------------|--------------------------------------------------------------------------------------------------------------|----------------------------------------------------------------------------|---------------------------------------------------------------------------------------------------------------------------------------------|----|----------------------------------------------------------------------------------------------------------------------------------------------------------------------------------------------------------------------------------------------------------------------------------------|
| Blackburn et al. [1986] | UK | o 36 | BDI                                          | CT<br>12–15 weeks<br><br>after acute treatment for 6 months: Booster- sessions every 6 weeks | no regulations, mostly Amitriptyline or Clomipramine (150 mg/Day); 12–15 weeks; 6 months maintenance therapy | RCT<br>CT vs. AD vs. CT + AD                                               | o: CT + AD = CT > AD<br>i: CT + AD > CT = AD<br>[Blackburn and Bishop, 1983; Blackburn et al., 1981]<br><br>FU: only patients who responded | 24 | maintenance relapses: therapy for the CT: 23%, AD: 78%, CT + AD: first 6 months 21%;<br>$\Rightarrow$ CT = CT + AD <sub>E</sub> > AD <sub>E</sub><br><br>naturalistic (6–24 months)                                                                                                    |
| Evans et al. [1992]     | US | o 44 | BDI, HAMD-17                                 | CT<br>max. 20 sessions in 12 weeks                                                           | Imipramine hydrochloride (75–300 mg/Day); 12 weeks<br><br>only some receive maintenance therapy              | RCT<br>CT vs. AD vs. CT + AD                                               | same efficacy for all treatment arms ; [Hollon et al., 1992]<br><br>FU: only patients who responded                                         | 24 | maintenance relapses: drug treatment AD: 50%, CT + AD: 15%, CT: for the first 12 months; not for CT / CT + AD<br>$\Rightarrow$ CT = AD <sub>E</sub> = CT + AD > AD<br><br>naturalistic                                                                                                 |
| Shea et al. [1992]      | US | o 76 | LIFE-II-II, CBT, IPT<br>HAMD-17 for 16 weeks |                                                                                              | Imipramine hydrochloride; week4: 163 mg/Day; week8: 231 mg/Day; 16 weeks                                     | RCT<br>CBT vs. IPT vs. AD + CM vs. Placebo + CM                            | same efficacy for all treatment arms [Elkin et al., 1989]<br><br>FU: no exclusion but focus on patients with therapeutic success            | 18 | naturalistic relapses: CBT: 36%, IPT: 33%, AD + CM: 50%, Placebo + CM: 33%;<br>Treatment during FU: CBT: 14%, IPT: 43%, Imipramine + CM: 44%, Placebo + CM: 27%;<br>recovery: CBT: 30%, IPT: 26%, AD + CM: 19%, Placebo + CM: 20%;<br>$\Rightarrow$ CBT = IPT = AD + CM = Placebo + CM |
| Simons et al. [1986]    | US | o 70 | BDI, HAMD<br>(44 Responder)                  | CT<br>max. 20 sessions in 12 weeks                                                           | Nortriptyline + max. 12 CM– sessions; 12 weeks                                                               | RCT<br>CT vs. AD vs. CT + Placebo vs. CT + AD<br>FU: information refers to | same efficacy for all treatment arms [Murphy et al., 1984]                                                                                  | 12 | naturalistic relapses: CT: 20%, AD: 66%, CT + Placebo: 18%, CT + AD: 43%;<br>53% underwent therapy or experienced relapse : 81%<br>remission: CT: 80%, AD: 33%, CT + Placebo: 82 %, CT + AD: 57%                                                                                       |

|                            |              |                       |                                       |                                                                           | patients who<br>responded                                                               |                                                                  |    | without and<br>36% with<br>therapeutic<br>success after<br>acute<br>treatment                                                                        | Treatment groups with AD:<br>higher risk of relapse;<br>⇒ CT / CT + Placebo > AD /<br>AD + CT                                                                                                                                                                                                                              |
|----------------------------|--------------|-----------------------|---------------------------------------|---------------------------------------------------------------------------|-----------------------------------------------------------------------------------------|------------------------------------------------------------------|----|------------------------------------------------------------------------------------------------------------------------------------------------------|----------------------------------------------------------------------------------------------------------------------------------------------------------------------------------------------------------------------------------------------------------------------------------------------------------------------------|
| Beck et al. US<br>[1985]   | o 22<br>A    | BDI,<br>HAM-D-17      | CT<br>20 sessions in 12<br>weeks      | Amitriptylinhydrochlorid<br>(75–200 mg/Day); 12<br>weeks                  | RCT<br>CT vs. CT + AD<br><br>FU: only<br>completers                                     | CT = CT + AD                                                     | 12 | naturalistic<br><br>CT + AD: 91%<br>had further<br>CT– sessions<br>(M = 14.18);<br>CT: 71% had<br>further CT–<br>sessions (M =<br>5.93)              | «markedly or completely<br>improved»:<br>CT: 58%, CT + AD: 82%;<br>⇒ CT = CT + AD                                                                                                                                                                                                                                          |
| Kovacs et al. US<br>[1981] | o 35<br>A    | BDI,<br>HAM-D-17      | CT<br>max. 20 sessions in<br>12 weeks | Imipraminhydrochlorid<br>(75–250 mg/Day) + max.<br>CM– sessions; 12 weeks | RCT<br>CT vs. AD<br><br>FU: only<br>completers                                          | CT > AD<br>[Rush et al., 1977]                                   | 12 | naturalistic                                                                                                                                         | remission:<br>CT: 56%, AD: 35%; only 1<br>significant difference: self-<br>assessment of depressive<br>symptoms (CT > AD);<br>⇒ CT = AD                                                                                                                                                                                    |
| Weissman<br>et al. [1981]  | US o 62<br>A | RDS,<br>HAM-D,<br>BDI | IPT<br>16 weeks                       | Amitriptylinhydrochloride<br>(100–200 mg/Day); 16<br>weeks                | RCT<br>AD vs. IPT vs.<br>AD + IPT vs.<br>KG<br>(unscheduled<br>sessions if<br>required) | IPT = AD > KG and < 12<br>IPT + AD<br>[Weissman et al.,<br>1979] |    | naturalistic<br><br>(15–40% drug<br>treatment; no<br>significant<br>difference,<br>however, more<br>often in AD<br>group: 27–<br>40% vs. 15–<br>27%) | significant improvement of<br>social functional level only<br>for IPT; based on the time<br>period: 28% symptom-free,<br>35% depressed at first, later<br>improvement, 15%<br>depressive > symptom-free<br>phases, 3% exacerbation of<br>symptoms, 8% chronically<br>depressive disorder;<br>⇒ AD = IPT = AD + IPT =<br>KG |

C = Country; NL = Netherlands; UK = United Kingdom; I = Italy; G = Germany; i = inpatient; o = outpatient; N = sample size; Q = depressive symptoms questionnaire; HAMD = Hamilton Depression Scale; BDI = Beck Depression Inventory; CIDI = Composite International Diagnostic Interview; SSRI = Selective Serotonin-Reuptake-Inhibitor; IPT = Interpersonal Psychotherapy; PDT = Psychodynamic Treatment; BDT = Brief Dynamic Psychotherapy; BA = Behavioral Activation; CT = Cognitive Therapy; CBT = Cognitive Behavioral Therapy; PS = Problem-Solving therapy; FU = Follow-up; CM = Clinical Management; ITT = Intention-to-Treat; SD = standard deviation; LIFE-II-II = Longitudinal Interval Follow-up Evaluation II; AD = antidepressant; RDS = Raskin Depression Scale.

---
