# Supplementary material
Source: publisher figshare collection journal article supplement (https://karger.figshare.com/articles/dataset/_/5129938)
Supplement: Supplementary file 3 [file 1]

Archive with 2 entries (2 files):
- 000446674_sm_Eversion.pdf
- 000446674_SM_Table.pdf
